# Supplementary material for: The Impact of Fermentation on Bee Pollen Polyphenolic Compounds Composition
Source: MDPI journal article supplement (doi:10.3390/antiox11040645), 2022-03-28
Supplement: s1 [file s1]

## Supplementary Material

### The Impact of Fermentation on Bee Pollen Polyphenolic Compounds Composition

Vaida Adaškevičiūtė, Vilma Kaškonienė, Karolina Barčauskaitė, Paulius Kaškonas and Audrius Maruška

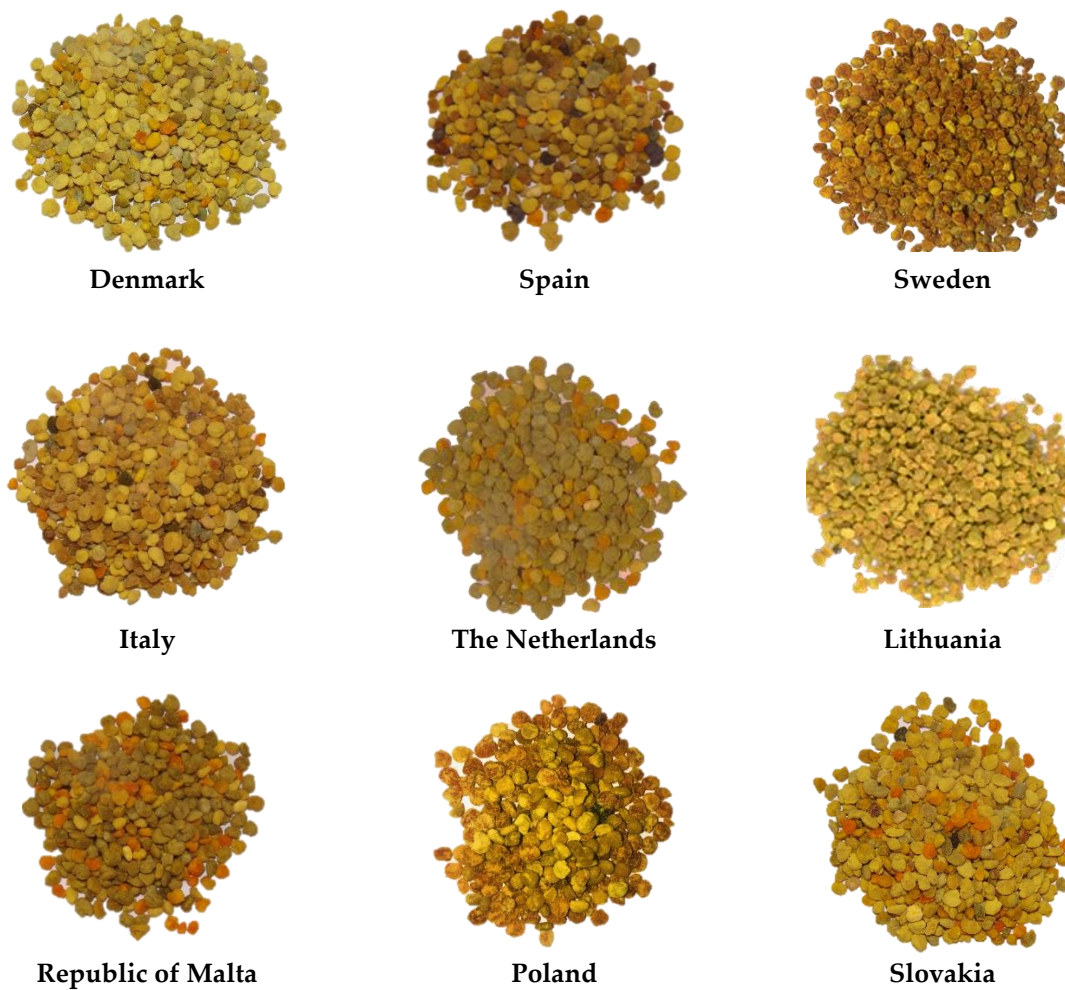

**Figure S1.** Visual appearance of the samples
